# Supplementary material
Source: MDPI journal article supplement (https://www.mdpi.com/1999-4907/15/5/743)
Supplement: s1 [file s1]

**Table S1.** Soil physical and chemical properties.

| Plot | SBD      | NO <sub>3</sub> <sup>-</sup> | NH <sub>4</sub> <sup>+</sup> | TP       | TK       | pH      | SOM      | TN      |
|------|----------|------------------------------|------------------------------|----------|----------|---------|----------|---------|
| WA   | 0.99±0.0 | 67.82±3.                     | 12.89±0.                     | 0.52±0.0 | 24.51±12 | 4.55±0. | 23.82±2. | 4.64±0. |
|      | 03c      | 06a                          | 86ab                         | 6a       | .03a     | 08a     | 91a      | 47a     |
| WB   | 1.1±0.05 | 59.70±3.                     | 8.63±1.5                     | 0.36±0.0 | 18.64±1. | 4.53±0. | 22.34±2. | 4.67±0. |
|      | b        | 87ab                         | 8b                           | 3b       | 81a      | 05a     | 24ab     | 15a     |
| WC   | 1.22±0.0 | 66.61±5.                     | 11.36±2.                     | 0.45±0.0 | 15.79±0. | 4.57±0. | 20.97±0. | 4.06±0. |
|      | 3a       | 42a                          | 41ab                         | 6ab      | 69a      | 09a     | 32ab     | 14a     |
| WC   | 1.22±0.0 | 56.67±4.                     | 16.81±4.                     | 0.52±0.0 | 25.5±2.3 | 4.59±0. | 20.00±0. | 4.08±1. |
| K    | 3a       | 27b                          | 68a                          | 5a       | 8a       | 08a     | 78b      | 12a     |

All data are presented as mean ± SD (n = 3). Different lowercase letters in the same column indicate statistically significant differences under different treatments ( $P < 0.05$ ).

**Table S2.** Importance value (%) of understory vegetation.

|       | Node | Species                          | WCK   | WA    | WB   | WC    |
|-------|------|----------------------------------|-------|-------|------|-------|
| Shrub | A    | <i>Smilax china</i> L.           | 2.15  | 3.84  | 3.6  | 3.26  |
|       | B    | <i>Quercus serrata</i>           | 13.93 | 5.61  | 7.64 | 5.93  |
|       | C    | <i>Ardisia crispa</i>            | —     | —     | 0.99 | —     |
|       | D    | <i>Aralia elata</i>              | 3.89  | 1.45  | 8.17 | 2.97  |
|       | E    | <i>Sarcandra glabra</i>          | —     | —     | —    | 0.77  |
|       | F    | <i>Ficus tikoua</i>              | 4.11  | —     | 2.71 | 0.63  |
|       | G    | <i>Urena lobata</i> L.           | 4.71  | 11.71 | —    | 2.95  |
|       | H    | <i>Rubus lambertianus</i> Ser.   | 1.96  | —     | —    | —     |
|       | I    | <i>Citrus reticulata</i> Blanco  | —     | 1.4   | —    | —     |
|       | J    | <i>Ficus gasparriniana</i>       | 2.06  | 5.32  | 2.95 | 2.03  |
|       | K    | <i>Dalbergia hupeana</i>         | —     | 3.44  | —    | —     |
|       | L    | <i>Rhododendron simsii</i>       | —     | —     | 0.8  | 1.17  |
|       | M    | <i>Mallotus barbatus</i> (Wall.) | 9.58  | 11.16 | 11.7 | 13.44 |
|       | N    | <i>Actinidia rubricaulis</i>     | —     | —     | 1.11 | 1.17  |
|       | O    | <i>Maesa japonica</i>            | —     | —     | —    | 0.67  |
|       | P    | <i>Callerya congestiflora</i>    | 1.96  | 1.81  | 3.36 | 2.14  |
|       | Q    | <i>Lycium chinense</i>           | —     | —     | 0.25 | —     |
|       | R    | <i>Helwingia japonica</i>        | 8.16  | —     | —    | 1.65  |
|       | S    | <i>Symplocos lancifolia</i>      | —     | —     | 0.34 | —     |
|       | T    | <i>Camellia japonica</i> L.      | 4.8   | —     | —    | 0.93  |
|       | U    | <i>Litsea cubeba</i>             | 3.11  | 3.65  | 1.6  | 2.41  |
|       | V    | <i>Ampelopsis delavayana</i>     | —     | 1.17  | 1.2  | 1.6   |
|       | W    | <i>Callicarpa giraldii</i>       | —     | —     | 1.03 | —     |
|       | X    | <i>Smilax arisanensis</i>        | —     | —     | 2.02 | 2.38  |
|       | Y    | <i>Rubus pirifolius</i>          | —     | —     | 2.69 | 4.07  |
|       | Z    | <i>Ardisia pusilla</i>           | —     | —     | —    | 0.82  |
|       | AA   | <i>Mallotus repandus</i>         | 2.72  | —     | 5.17 | —     |
|       | AB   | <i>Rubus corchorifolius</i>      | —     | 1.57  | 4.31 | 4.04  |
|       | AC   | <i>Eurya japonica</i> Thunb.     | —     | —     | —    | 2.56  |
|       | AD   | <i>Glochidion puberum</i>        | 3.09  | —     | —    | —     |

|      |    |                                     |       |       |       |       |
|------|----|-------------------------------------|-------|-------|-------|-------|
|      | AE | <i>Debregeasia orientalis</i>       | –     | 3.12  | 2.25  |       |
|      | AF | <i>Rubus chroosepalus</i>           | –     | –     | 2.62  | 4.72  |
|      | AG | <i>Myrsine africana</i> L.          | 1.96  | 11.51 | 0.55  | 3.72  |
|      | AH | <i>Broussonetia kaempferi</i>       | –     | 1.45  | 2.48  | –     |
|      | AI | <i>Eurya loquaiana</i>              | 3.05  | 5.57  | 4.17  | 5.46  |
|      | AJ | <i>Viburnum utile</i> Hemsl.        | 2.43  | –     | –     | 2.56  |
|      | AK | <i>Pericampylus glaucus</i>         | –     | 1.18  | 5.74  | 1.33  |
|      | AL | <i>Litsea pungens</i> Hemsl.        | –     | 1.36  | 1.29  | 0.64  |
|      | AM | <i>Melastoma malabathricum</i>      | 1.62  | 3.73  | 2.89  | 3.61  |
|      | AN | <i>Cinnamomum camphora</i>          | 22.73 | 10.24 | 10.05 | 9.01  |
|      | AO | <i>Ardisia japonica</i>             | 1.96  | 6.71  | 1.32  | 3.99  |
|      | AP | <i>Gardenia jasminoides</i>         | –     | 1.45  | 0.99  | 3.62  |
|      | AQ | <i>Ficus stenophylla</i>            | –     | 1.9   | 1.95  | 0.95  |
|      | AR | <i>Euscaphis japonica</i>           | –     | –     | 1.61  | 2.65  |
| Herb | AS | <i>Pittosporum glabratum</i>        | –     | –     | –     | 1.37  |
|      | AT | <i>Microlepidia marginata</i>       | 4.1   | –     | –     | 2.91  |
|      | AU | <i>Eupatorium japonicum</i>         | –     | 1.81  | 4.14  | 4.06  |
|      | AV | <i>Blumea megacephala</i>           | 2.28  | –     | 3.41  | 3.38  |
|      | AW | <i>Lophatherum gracile</i>          | –     | 4.79  | 6.52  | 4     |
|      | AX | <i>Dryopteris fuscipes</i>          | 2.3   | 4.64  | 2.74  | 1.89  |
|      | AY | <i>Woodwardia japonica</i>          | –     | 2.74  | 4.04  | 2.75  |
|      | AZ | <i>Parathelypteris glanduligera</i> | 9.57  | 3.34  | –     | 7.27  |
|      | BA | <i>Synotis nagensium</i>            | 7.37  | 2.33  | –     | 6.72  |
|      | BB | <i>Pteridium aquilinum</i>          | 17.05 | 24.05 | 6.11  | 9.61  |
|      | BC | <i>Microlepidia hancei</i>          | 3.1   | 5.7   | 8.51  | 6.56  |
|      | BD | <i>Miscanthus sinensis</i>          | 12.9  | 3.56  | 11.69 | 6.39  |
|      | BE | <i>Arthraxon hispidus</i>           | –     | 4.09  | 3.46  | 2.63  |
|      | BF | <i>Dicranopteris pedata</i>         | 3.5   | 9.23  | 13.26 | 16.18 |
|      | BG | <i>Odontosoria chinensis</i>        | 9.21  | 2.33  | 6.74  | 4.25  |
|      | BH | <i>Iris tectorum</i>                | 14.25 | 16.32 | 7.8   | –     |
|      | BI | <i>Setaria plicata</i>              | 11.05 | 7.84  | 3.35  | 10.95 |
|      | BJ | <i>Cyperus rotundus</i> L.          | –     | –     | 8.92  | –     |
|      | BK | <i>Oplismenus compositus</i>        | 1.59  | 7.23  | 2.68  | 1.35  |
|      | BL | <i>Oxalis corniculata</i> L.        | 1.72  | –     | –     | 2.52  |
|      | BM | <i>Hylodesmum podocarpum</i>        | –     | –     | 3.68  | –     |
|      | BN | <i>Arachniodes chinensis</i>        | –     | –     | 2.92  | 6.56  |

**Table S3.** Alpha diversity of soil fungal community.

| Plot | ace            | Chao            | Shannon     | Simpson    |
|------|----------------|-----------------|-------------|------------|
| WA   | 847.97±77.01a  | 834.50±81.41a   | 4.27±0.543a | 0.05±0.03a |
| WB   | 603.24±178.45a | 598.35±167.59a  | 3.58±0.299a | 0.09±0.04a |
| WC   | 699.66±115.02a | 704.25±117.745a | 4.27±0.19a  | 0.04±0.01a |
| WCK  | 798.83±114.89a | 792.20±109.82a  | 4.14±0.34a  | 0.05±0.02a |

All data are presented as means ± SD (n = 3). Different lowercase letters in the same column indicate

statistically significant differences under different treatments ( $P < 0.05$ ).

**Table S4.** Network center coefficient of soil fungal community at the phyla level.

| Node Name                 | Degree Centrality | Closeness Centrality | Betweenness Centrality |
|---------------------------|-------------------|----------------------|------------------------|
| WA                        | 0.84              | 0.86                 | 0.35                   |
| WB                        | 0.74              | 0.73                 | 0.14                   |
| WC                        | 0.74              | 0.73                 | 0.14                   |
| WCK                       | 0.68              | 0.68                 | 0.11                   |
| p__Ascomycota             | 0.21              | 0.56                 | 0.01                   |
| p__Basidiobolomycota      | 0.21              | 0.56                 | 0.01                   |
| p__Basidiomycota          | 0.21              | 0.56                 | 0.01                   |
| p__Blastocladiomycota     | 0.16              | 0.53                 | <0.01                  |
| p__Calcarisporiellomycota | 0.21              | 0.56                 | 0.01                   |
| p__Chytridiomycota        | 0.21              | 0.56                 | 0.01                   |
| p__Entorrhizomycota       | 0.21              | 0.56                 | 0.01                   |
| p__GS01                   | 0.05              | 0.48                 | 0.00                   |
| p__Glomeromycota          | 0.21              | 0.56                 | 0.01                   |
| p__Kickxellomycota        | 0.21              | 0.56                 | 0.01                   |
| p__Mortierellomycota      | 0.21              | 0.56                 | 0.01                   |
| p__Mucoromycota           | 0.21              | 0.56                 | 0.01                   |
| p__Olpidiomycota          | 0.05              | 0.48                 | <0.01                  |
| p__Rozellomycota          | 0.21              | 0.56                 | 0.01                   |
| p__Zoopagomycota          | 0.21              | 0.56                 | 0.01                   |
| p__unclassified_k__Fungi  | 0.21              | 0.56                 | 0.01                   |

**Table S5.** Network center coefficient of soil fungal community at the genera level.

| Node Name                                  | Degree Centrality | Closeness Centrality | Betweenness Centrality | Degree |
|--------------------------------------------|-------------------|----------------------|------------------------|--------|
| <i>Mortierella</i>                         | 0.11              | 0.30                 | 0.24                   | 5      |
| <i>Clavulina</i>                           | 0.04              | 0.24                 | 0.10                   | 2      |
| <i>unclassified_o__Sordariales</i>         | 0.06              | 0.26                 | 0.01                   | 3      |
| <i>Penicillium</i>                         | 0.11              | 0.28                 | 0.18                   | 5      |
| <i>unclassified_o__GS23</i>                | 0.09              | 0.28                 | 0.14                   | 4      |
| <i>Sagenomella</i>                         | 0.13              | 0.30                 | 0.13                   | 6      |
| <i>Trichoderma</i>                         | 0.02              | 0.17                 | <0.01                  | 1      |
| <i>unclassified_o__Chaetothyriales</i>     | 0.04              | 0.20                 | 0.04                   | 2      |
| <i>unclassified_p__Rozellomycota</i>       | 0.02              | 0.17                 | <0.01                  | 1      |
| <i>Cladophialophora</i>                    | 0.09              | 0.21                 | 0.05                   | 4      |
| <i>Chaetosphaeria</i>                      | 0.02              | 0.16                 | <0.01                  | 1      |
| <i>Saitozyma</i>                           | 0.06              | 0.20                 | 0.04                   | 3      |
| <i>Tolypocladium</i>                       | 0.06              | 0.22                 | 0.08                   | 3      |
| <i>Metarhizium</i>                         | 0.09              | 0.24                 | 0.16                   | 4      |
| <i>Geminibasidium</i>                      | 0.06              | 0.23                 | 0.11                   | 3      |
| <i>unclassified_f__Herpotrichiellaceae</i> | 0.06              | 0.27                 | 0.20                   | 3      |
| <i>Russula</i>                             | 0.02              | 0.18                 | <0.01                  | 1      |

|                                         |      |      |       |   |
|-----------------------------------------|------|------|-------|---|
| <i>Talaromyces</i>                      | 0.06 | 0.24 | 0.13  | 3 |
| <i>Tomentella</i>                       | 0.02 | 0.19 | <0.01 | 1 |
| <i>Membranomyces</i>                    | 0.04 | 0.19 | 0.03  | 2 |
| <i>Fusicolla</i>                        | 0.04 | 0.19 | 0.03  | 2 |
| <i>Pseudopithomyces</i>                 | 0.04 | 0.21 | 0.05  | 2 |
| <i>Scytalidium</i>                      | 0.06 | 0.21 | 0.08  | 3 |
| <i>Paraboeremia</i>                     | 0.02 | 0.17 | <0.01 | 1 |
| <i>Trichophaea</i>                      | 0.09 | 0.24 | 0.18  | 4 |
| <i>unclassified_f_Thelephoraceae</i>    | 0.02 | 0.20 | <0.01 | 1 |
| <i>Umbelopsis</i>                       | 0.11 | 0.29 | 0.29  | 5 |
| <i>Amanita</i>                          | 0.04 | 0.20 | 0.04  | 2 |
| <i>unclassified_c_Agaricomycetes</i>    | 0.02 | 0.18 | <0.01 | 1 |
| <i>Rhizopogon</i>                       | 0.04 | 0.22 | 0.04  | 2 |
| <i>unclassified_f_Hyaloscyphaceae</i>   | 0.09 | 0.28 | 0.10  | 4 |
| <i>unclassified_o_Helotiales</i>        | 0.11 | 0.30 | 0.20  | 5 |
| <i>unclassified_c_Eurotiomycetes</i>    | 0.09 | 0.25 | 0.10  | 4 |
| <i>Penicillifer</i>                     | 0.09 | 0.26 | 0.03  | 4 |
| <i>Helvellosebacina</i>                 | 0.04 | 0.25 | <0.01 | 2 |
| <i>Inocybe</i>                          | 0.06 | 0.27 | 0.07  | 3 |
| <i>unclassified_f_Ceratobasidiaceae</i> | 0.11 | 0.25 | 0.10  | 5 |
| <i>Chloridium</i>                       | 0.04 | 0.22 | 0.01  | 2 |
| <i>unclassified_f_Agaricaceae</i>       | 0.09 | 0.25 | 0.03  | 4 |
| <i>unclassified_k_Fungi</i>             | 0.11 | 0.25 | 0.08  | 5 |
| <i>Bifiguratus</i>                      | 0.04 | 0.26 | 0.07  | 2 |
| <i>Tylospora</i>                        | 0.04 | 0.24 | <0.01 | 2 |
| <i>Oidiodendron</i>                     | 0.02 | 0.22 | <0.01 | 1 |
| <i>unclassified_o_Leucosporidiales</i>  | 0.02 | 0.20 | <0.01 | 1 |
| <i>unclassified_o_Venturiales</i>       | 0.02 | 0.02 | <0.01 | 1 |
| <i>unclassified_p_Ascomycota</i>        | 0.02 | 0.02 | <0.01 | 1 |
| <i>unclassified_o_GS11</i>              | 0.02 | 0.16 | <0.01 | 1 |
| <i>unclassified_c_Dothideomycetes</i>   | 0.02 | 0.20 | <0.01 | 1 |

**Table S6.** Degree values of different species.

| Node_Name | Degree |
|-----------|--------|
| A         | 6      |
| AN        | 10     |
| AO        | 3      |
| B         | 5      |
| BB        | 10     |
| BC        | 11     |
| BD        | 6      |
| BF        | 6      |
| BG        | 6      |
| BI        | 7      |

---

|                                                         |    |
|---------------------------------------------------------|----|
| D                                                       | 6  |
| M                                                       | 6  |
| P                                                       | 3  |
| U                                                       | 11 |
| <i>Amanita</i>                                          | 3  |
| <i>Archaeorhizomyces</i>                                | 1  |
| <i>Bifiguratus</i>                                      | 2  |
| <i>Ciliophora</i>                                       | 5  |
| <i>Clavulina</i>                                        | 1  |
| <i>Clitopilus</i>                                       | 2  |
| <i>Clonostachys</i>                                     | 1  |
| <i>Dactylella</i>                                       | 2  |
| <i>Fusarium</i>                                         | 3  |
| <i>Geomyces</i>                                         | 1  |
| <i>Gliocladiopsis</i>                                   | 1  |
| <i>Gongronella</i>                                      | 3  |
| <i>Humicolopsis_f_Pezizomycotina_fam_Incertae_sedis</i> | 1  |
| <i>Ilyonectria</i>                                      | 1  |
| <i>Lactarius</i>                                        | 4  |
| <i>Mycena</i>                                           | 1  |
| <i>Neocosmospora</i>                                    | 5  |
| <i>Rasamsonia</i>                                       | 4  |
| <i>Russula</i>                                          | 1  |
| <i>Scytalidium</i>                                      | 1  |
| <i>Solicoccozyma</i>                                    | 1  |
| <i>Talaromyces</i>                                      | 4  |
| <i>Thelonectria</i>                                     | 4  |
| <i>Tomentella</i>                                       | 1  |
| <i>Trechispora</i>                                      | 3  |
| <i>Trichoderma</i>                                      | 4  |
| <i>Trichophaea</i>                                      | 7  |
| <i>Tylospora</i>                                        | 1  |
| <i>Umbelopsis</i>                                       | 1  |
| <i>Unclassified_c_Entorrhizomycetes</i>                 | 5  |
| <i>Unclassified_c_Leotiomyces</i>                       | 3  |
| <i>Unclassified_c_Sordariomycetes</i>                   | 1  |
| <i>Unclassified_f_Agaricaceae</i>                       | 2  |
| <i>Unclassified_f_Chaetosphaeriaceae</i>                | 1  |
| <i>Unclassified_f_Herpotrichiellaceae</i>               | 1  |
| <i>Unclassified_f_Hymenochaetaceae</i>                  | 4  |
| <i>Unclassified_f_Thelephoraceae</i>                    | 1  |
| <i>Unclassified_f_Trichosporonaceae</i>                 | 1  |
| <i>Unclassified_o_Rhizophydiales</i>                    | 1  |
| <i>Unclassified_o_Venturiales</i>                       | 6  |

---

|                                   |   |
|-----------------------------------|---|
| <i>Unclassified_p__Ascomycota</i> | 1 |
|-----------------------------------|---|

For a specific explanation of plant nodes, see Table S2.
