# Supplementary material
Source: MDPI journal article supplement (https://www.mdpi.com/1999-4907/15/5/743)
Supplement: s1 [file s1]

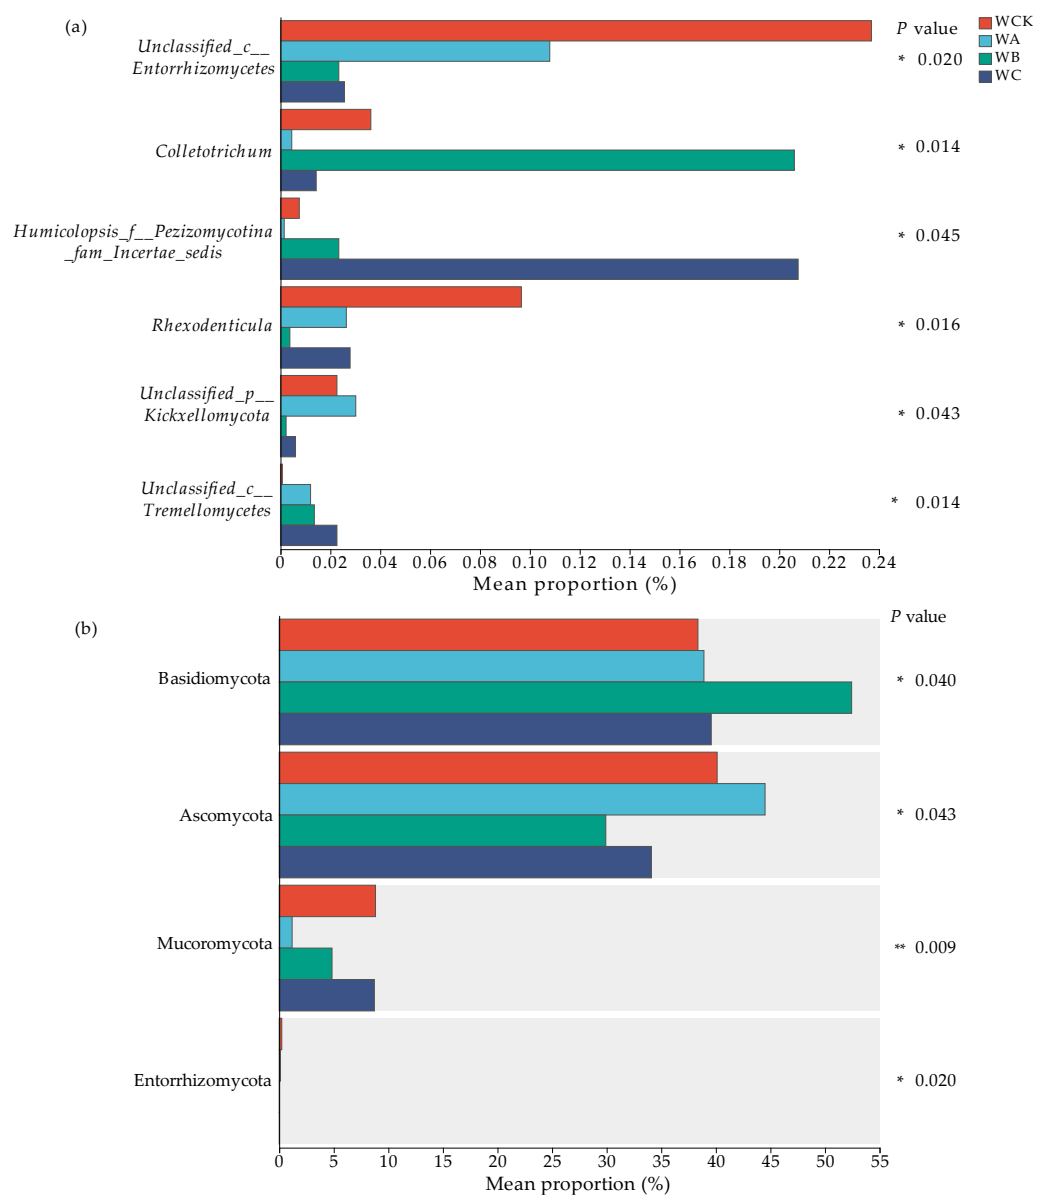

**Figure. S1. The One-way ANOVA test examines fungal abundance at both the genera (a) and phyla (b) levels. Only the taxa that differed between the crop tree densities were shown.**
